# Supplementary material for: Temperature-Driven Twin Structure Formation and Electronic Structure of Epitaxially Grown Mg3Sb2 Films on Mismatched Substrates
Source: MDPI journal article supplement (doi:10.3390/nano12244429), 2022-12-12
Supplement: s1 [file s1]

*Supporting information:*

# Temperature-Driven Twin Structure Formation and Electronic Structure of Epitaxially Grown $\text{Mg}_3\text{Sb}_2$ Films on Mismatched Substrates

Sen Xie <sup>1,2,†</sup>, Yujie Ouyang <sup>1,2,†</sup>, Wei Liu <sup>1,\*</sup>, Fan Yan <sup>1</sup>, Jiangfan Luo <sup>1</sup>, Xianda Li <sup>1</sup>, Ziyu Wang <sup>3</sup>, Yong Liu <sup>4,\*</sup> and Xinfeng Tang <sup>1,\*</sup>

<sup>1</sup> State Key Laboratory of Advanced Technology for Materials Synthesis and Processing, Wuhan University of Technology, Wuhan 430070, China

<sup>2</sup> International School of Materials Science and Engineering, Wuhan University of Technology, Wuhan 430070, China

<sup>3</sup> The Institute of Technological Sciences, Wuhan University, Wuhan 430072, China; zywang@whu.edu.cn

<sup>4</sup> School of Physics and Technology and The Key Laboratory of Artificial Micro- and Nano-Structures of Ministry of Education, Wuhan University, Wuhan 430072, China

\* Correspondence: w.liu@whut.edu.cn (W.L.); yongliu@whu.edu.cn (Y.L.); tangxf@whut.edu.cn (X.T.)

† These authors contributed equally to this work.

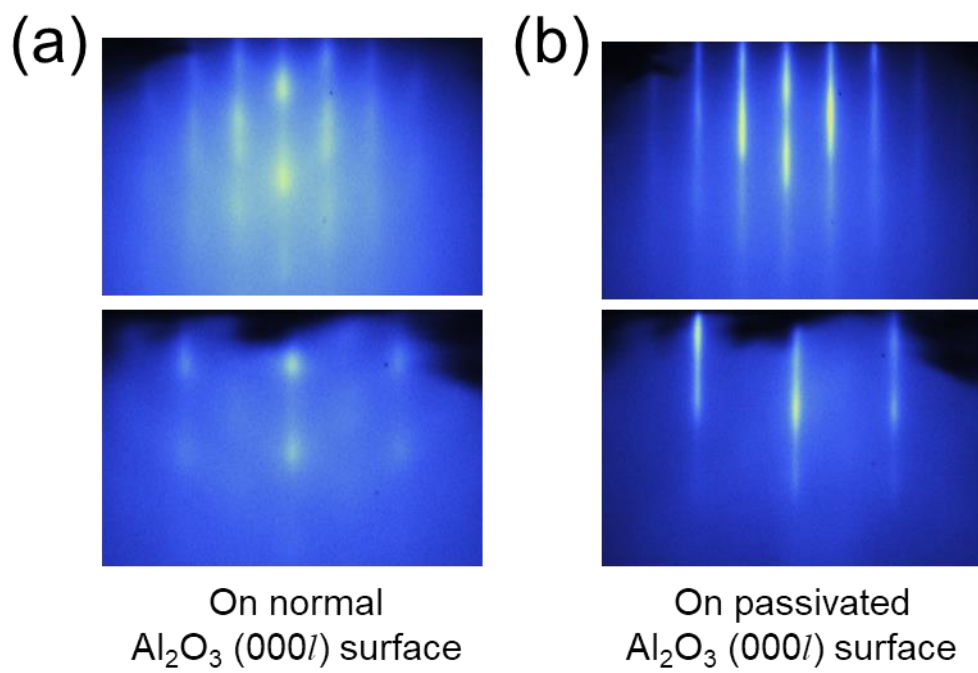

**Figure S1.** The RHEED patterns of  $\text{Mg}_3\text{Sb}_2$  films grown on  $\text{Al}_2\text{O}_3$  (0001) substrates with and without passivation treatment.

The RHEED patterns of  $\text{Mg}_3\text{Sb}_2$  grown on different substrates

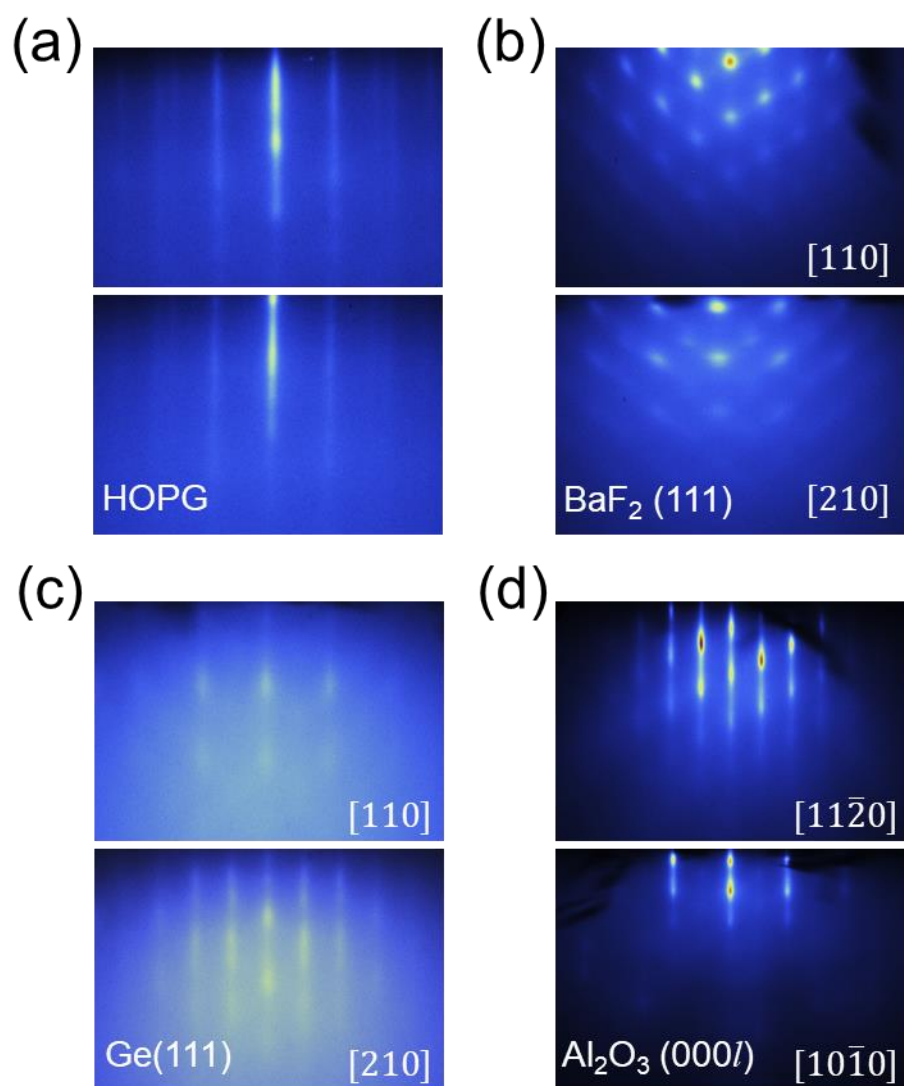

**Figure S2.** The RHEED patterns of  $\text{Mg}_3\text{Sb}_2$  grown on different substrates: (a) cleaved HOPG, (b)  $\text{BaF}_2$  (111), (c) Ge (111), and (d)  $\text{Al}_2\text{O}_3$  (000l) substrates. The  $\text{Mg}_3\text{Sb}_2$  grown on  $\text{Al}_2\text{O}_3$  shows the highest crystallinity.

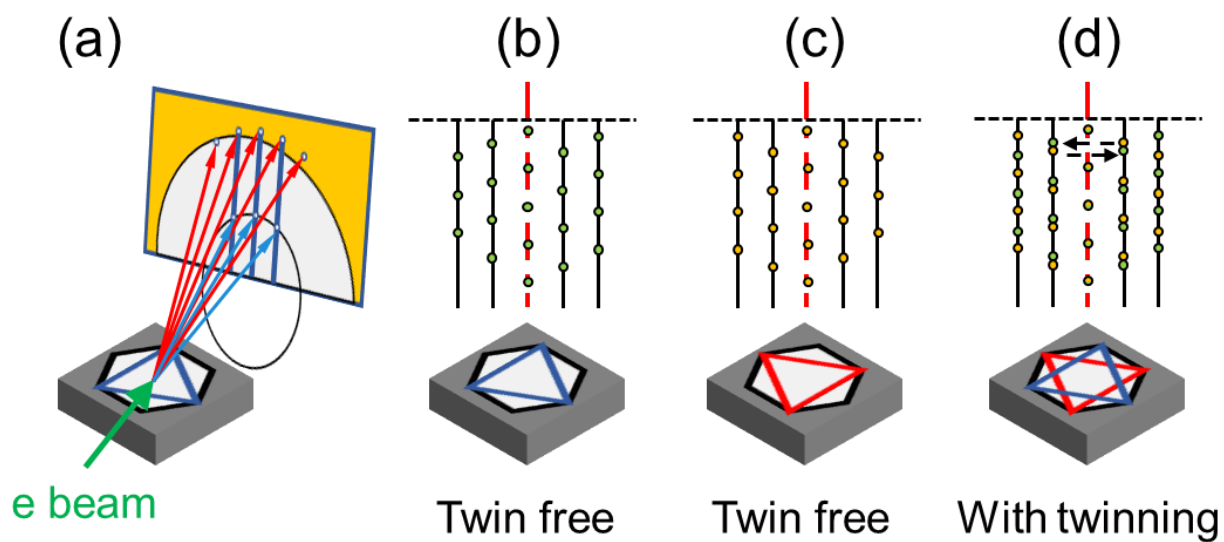

**Figure S3.** (a) Schematic illustration of the RHEED measurement. (b-d) RHEED patterns of hexagonal lattice with and without twin domains.

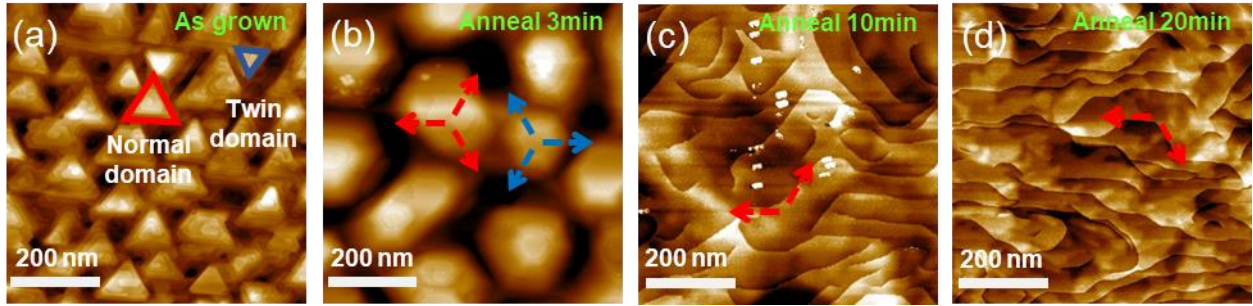

**Figure S4.** STM surface morphology and structure evolution of  $\text{Mg}_3\text{Sb}_2$  films grown at 773 K: (a), as-grown; (b), annealed for 3 mins; (c), annealed for 10 mins; (d), annealed for 20 mins. Twin domains are marked by blue triangles in (a) and blue arrows in (b). Annealing at 773 K significantly promotes the crystallinity of films, which is evident from the prominent layer structure and increased grain size.

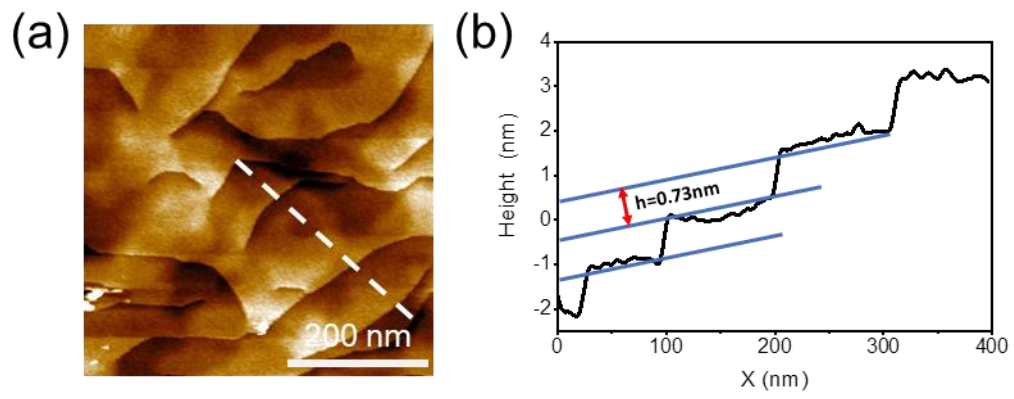

**Figure S5.** Layer structure of the  $\text{Mg}_3\text{Sb}_2$  film grown at 773 K and annealed at 773 K for 20 mins: (a) STM surface morphology, (b) The height profile along the white dashed line in (a). The thickness of a single layer is  $\sim 0.7$  nm, in agreement with the spacing of a single lattice layer.
